# Supplementary material
Source: publisher figshare collection journal article supplement (https://frontiersin.figshare.com/ndownloader/files/28518450)

# **Physiological and biochemical traits of two major *Arabidopsis* accessions, Col-0 and Ws, under salinity**

Leschevin *et al.*

**Fig. S1. Effect on salt stress on shoot biomass (A) and (B) shoot tolerance index (TI)**

**Fig. S2. Photosynthetic pigment content ( $\text{mg.g}^{-1}$  DM) in Ws and Col-0 control and salt-treated plants**

**Fig. S3. Enzymatic activities of oxido-reductases in Ws and Col-0 control and salt-treated plants**

**Fig. S1. Shoot biomass and shoot tolerance index.** (A) Shoots fresh mass and (B) shoot tolerance index in plants grown under control conditions and 150 mM of NaCl at T48, T72 and T96. Data are means  $\pm$  standard deviation (SD) of three biological replicates. Means followed by the same letter in the same graph are not significantly different according to Dunn test.

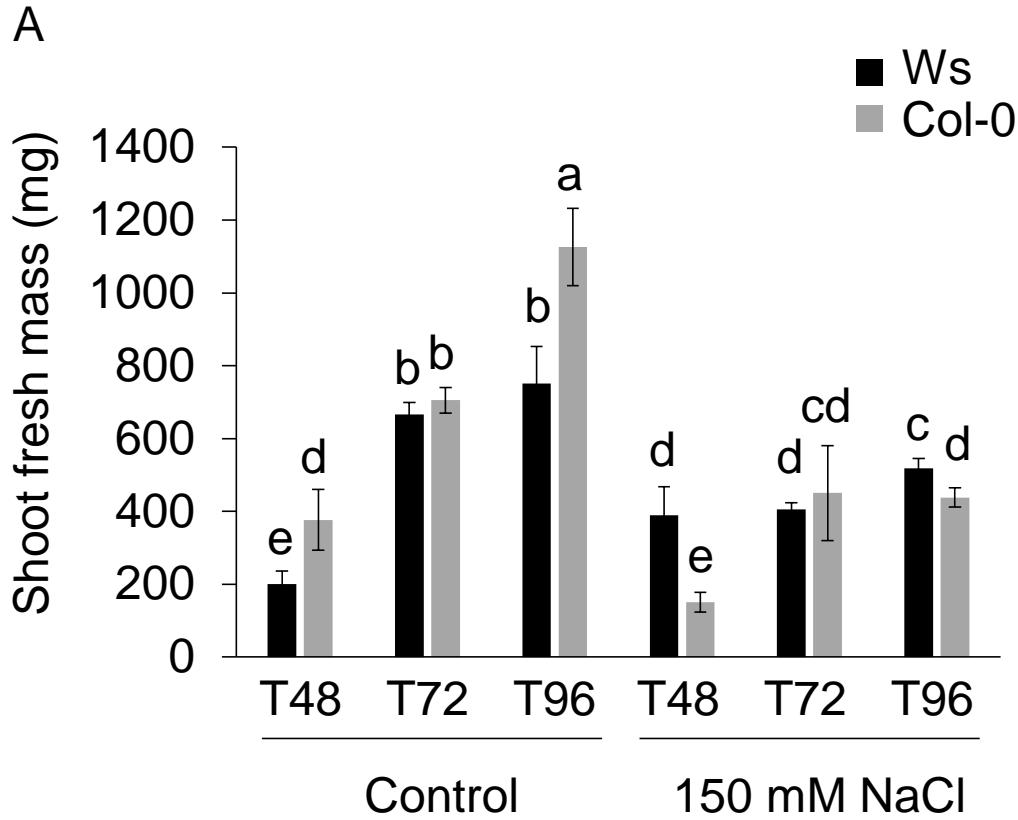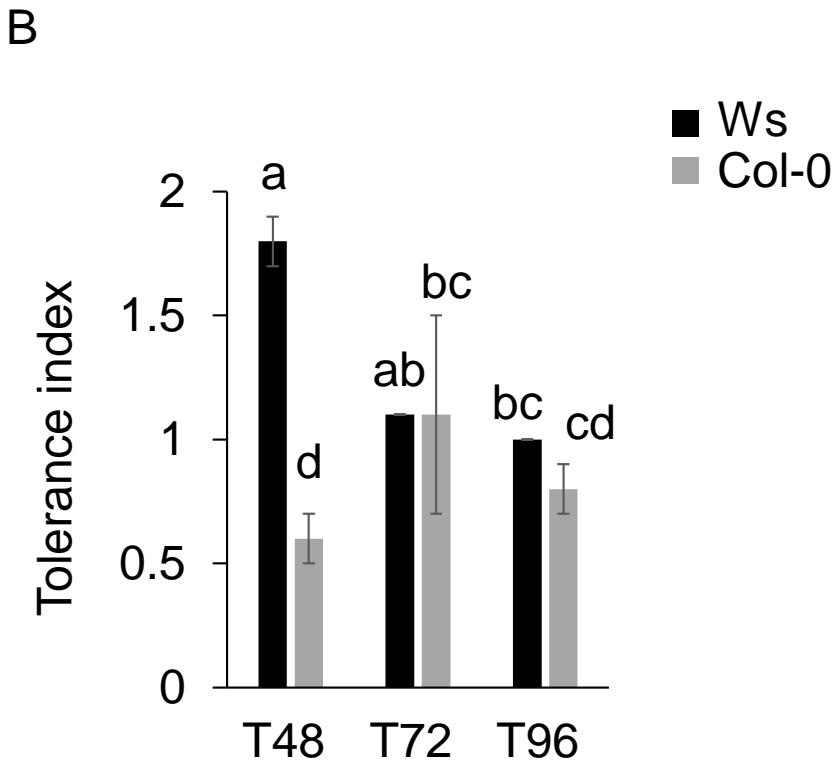

**Fig. S2. Photosynthetic pigment content (mg.g<sup>-1</sup> DM) in Ws and Col-0 control and salt-treated plants.** (A) Chlorophyll and (B) carotenoid contents in plants grown under control conditions and 150 mM of NaCl at T48, T72 and T96. Chl meaning chlorophyll, xanthophyll being the sum of lutein, neoxanthin, violaxanthin and antheraxanthin. Data are means  $\pm$  standard deviation (SD) of three biological replicates. Means followed by the same letter for the same pigment in the same graph are not significantly different according to Dunn test.

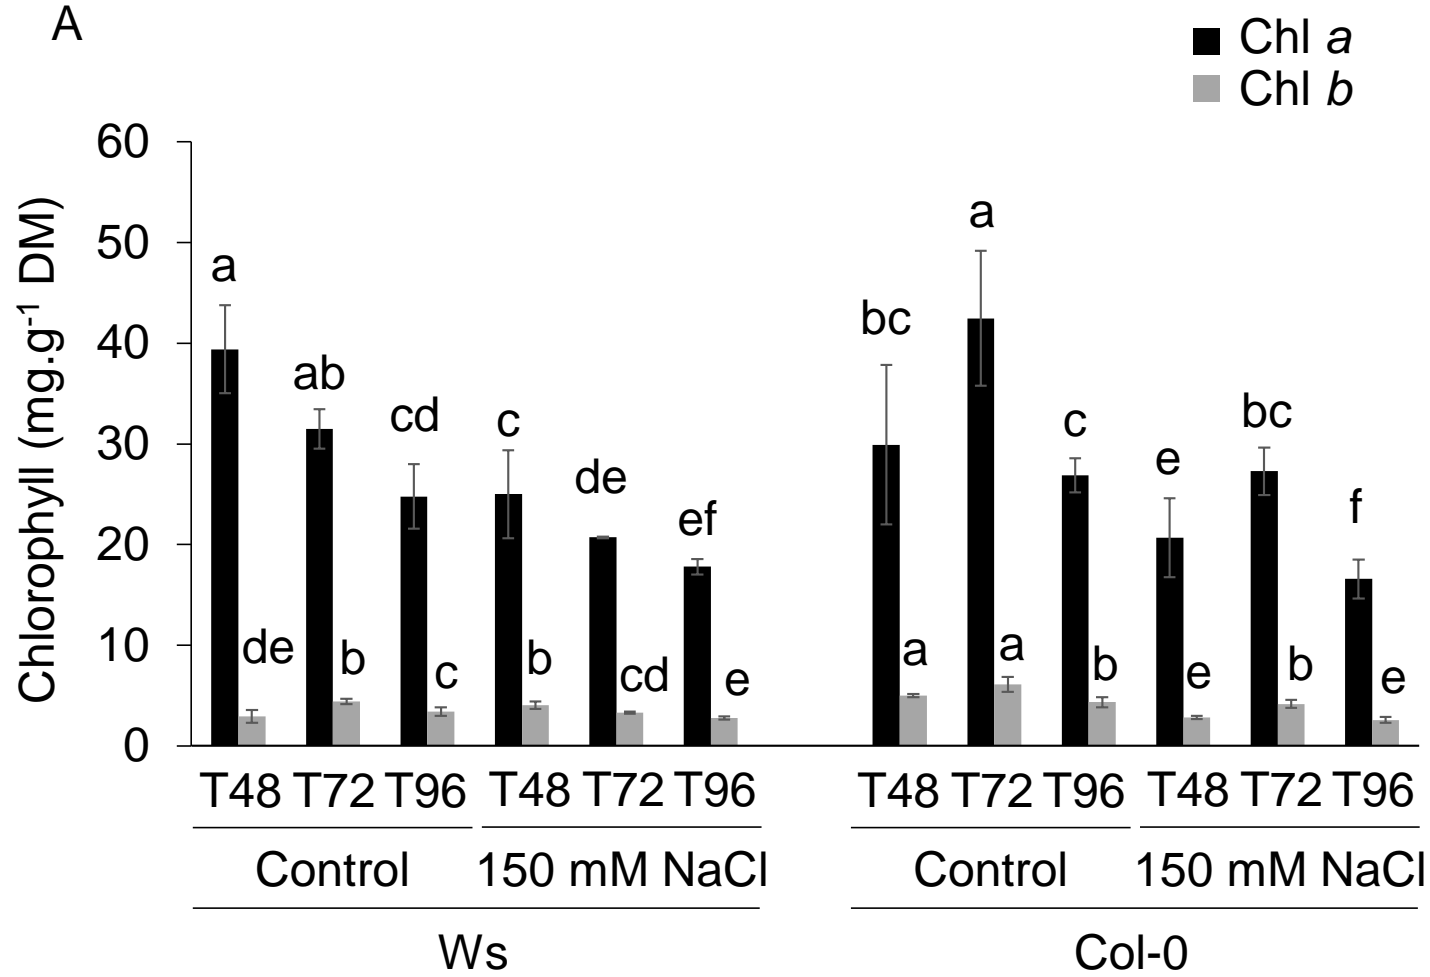

B

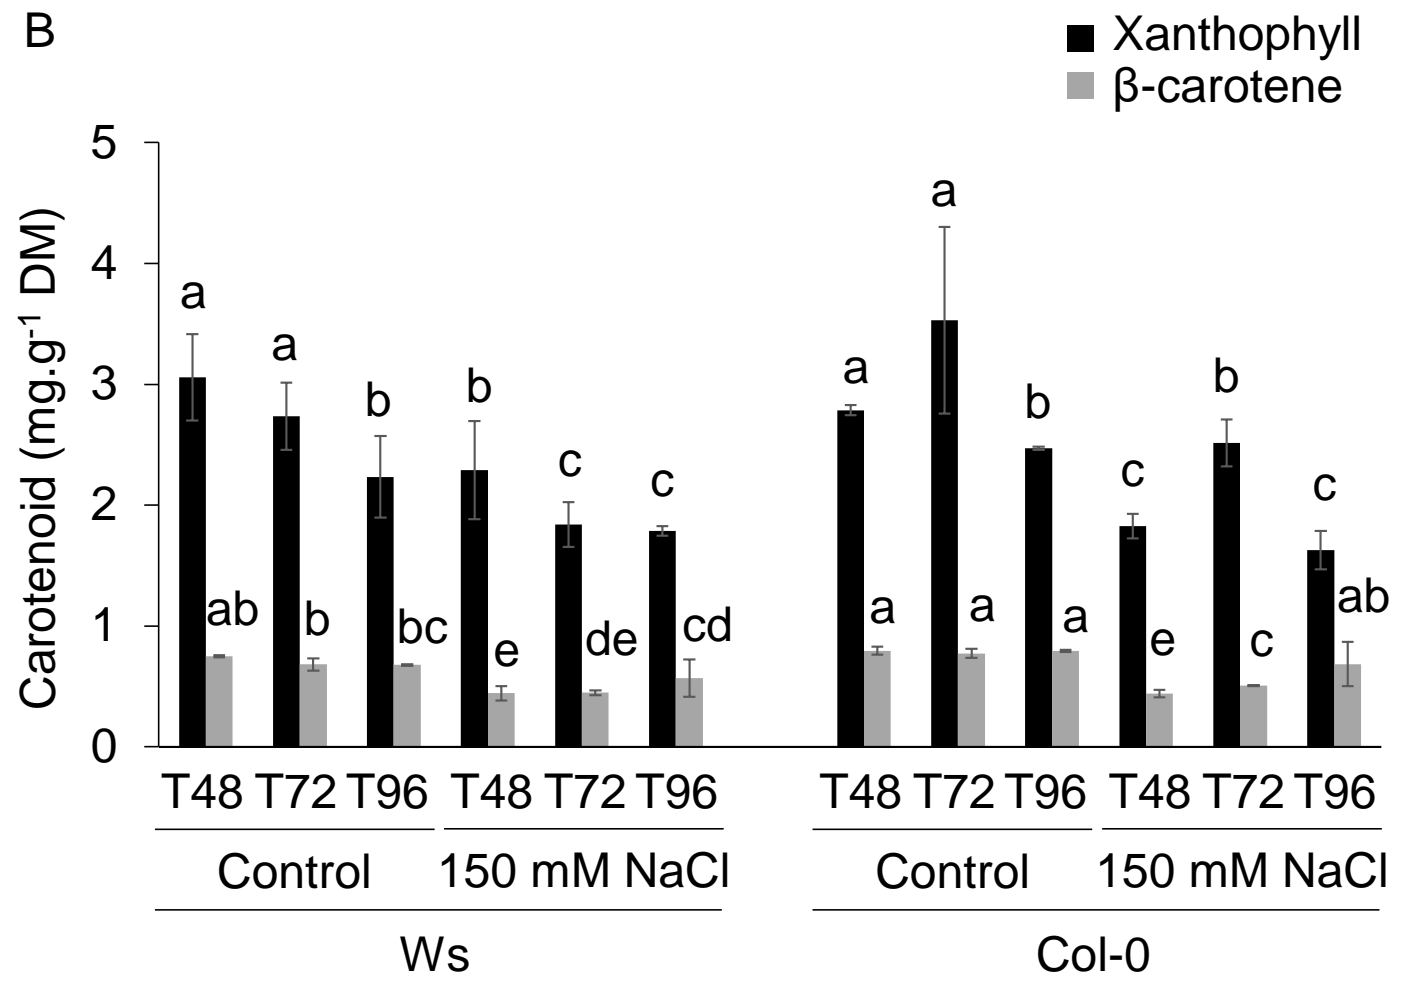

**Fig. S3. Enzymatic activities of oxido-reductases in Ws and Col-0 control and salt-treated plants.** (A) CAT, (B) APOX and (C) GR enzyme activities measured under control conditions and 150 mM of NaCl at T48, T72 and T96. CAT stands for catalase, APOX for ascorbate peroxidase and GR for glutathione reductase. Data are means  $\pm$  standard deviation (SD) of three biological replicates. Means followed by the same letter in the same graph are not significantly different according to Dunn test.

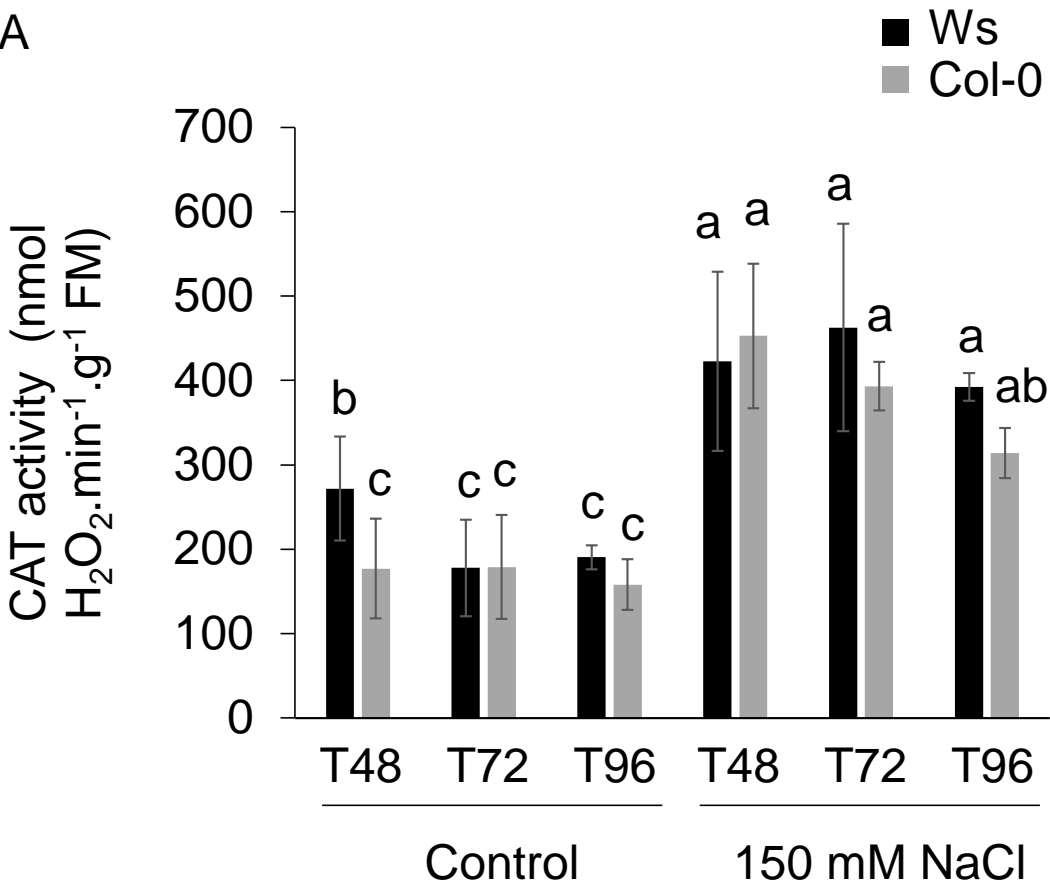

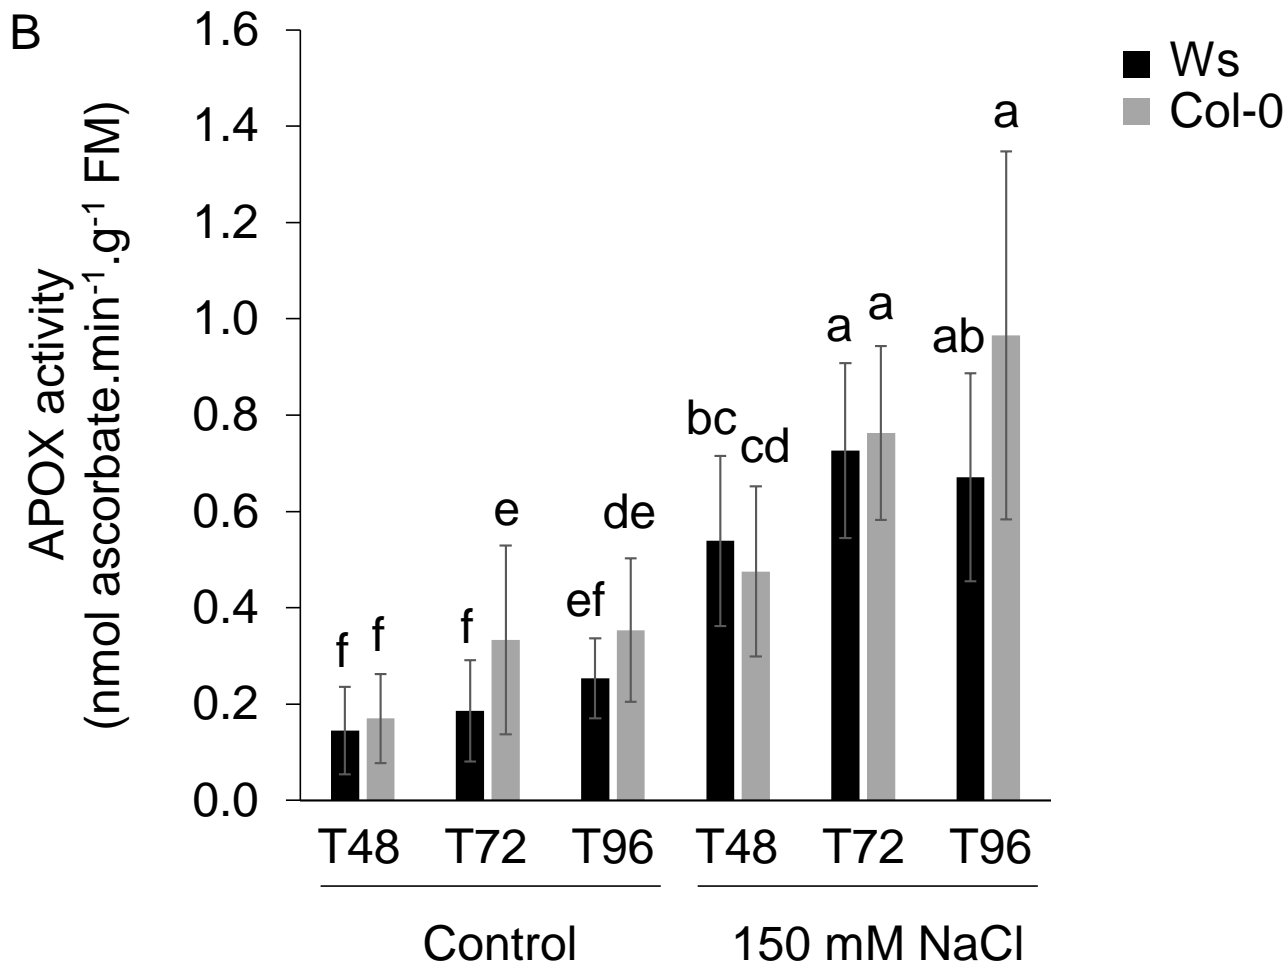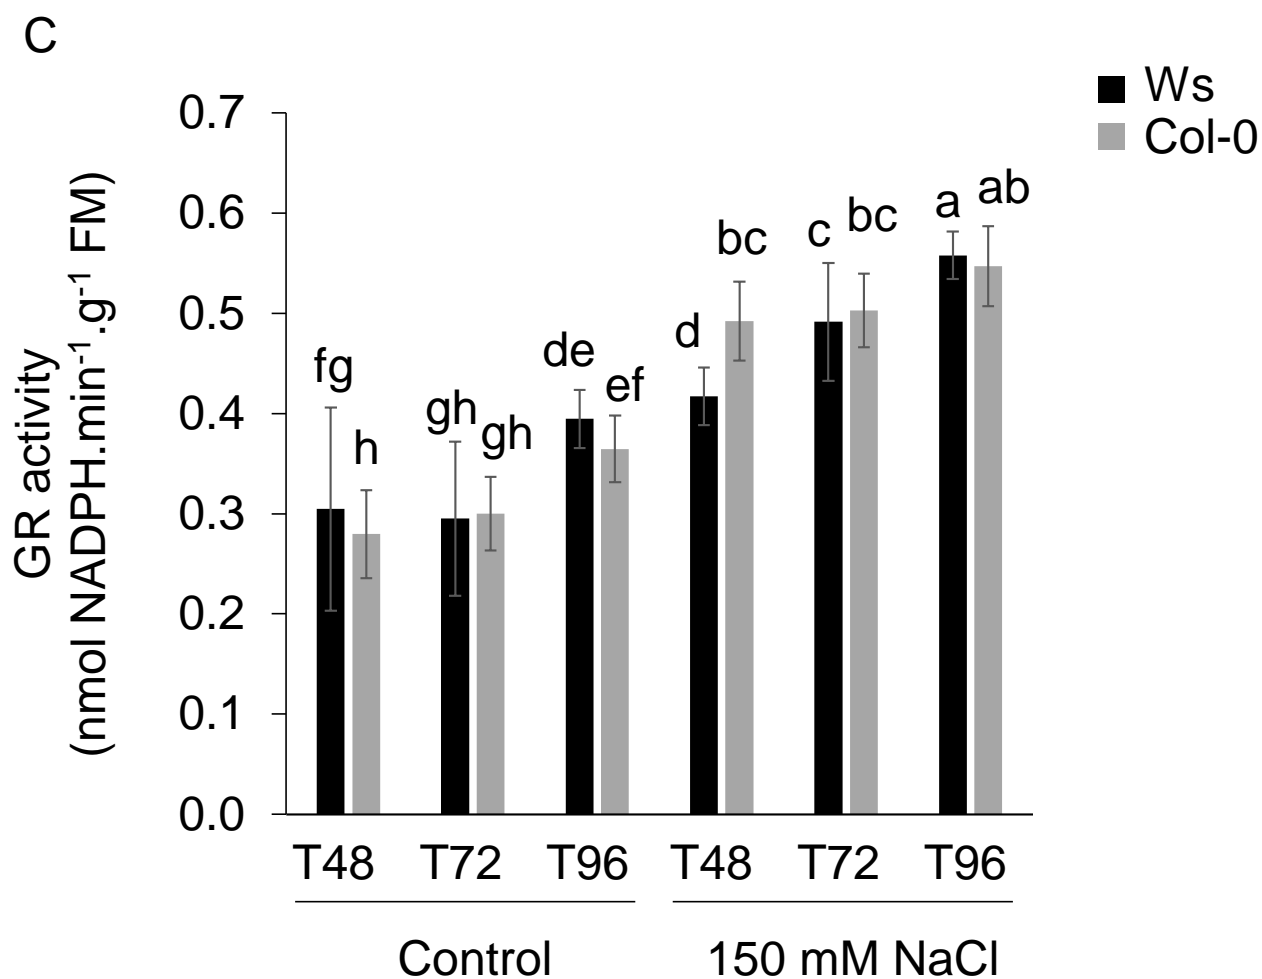

Supplement: Supplementary file [file 28518450]
